1 **First Phase 1b, single-center, age de-escalation trial of the *P. falciparum***  
2 **blood-stage malaria vaccine candidate RH5.1/Matrix-M™:**  
3 **a delayed boost regimen induces high levels of functional antibodies**  
4 **in 5-17 month old Tanzanian infants**

5  
6 Sarah E. Silk<sup>1,2,3</sup>, Wilmina F. Kalinga<sup>4,#</sup>, Jo Salkeld<sup>1,2,3,#</sup>, Ivanny M. Mtaka<sup>4</sup>, Saumu Ahmed<sup>4</sup>, Florence  
7 Milando<sup>4</sup>, Ababacar Diouf<sup>5</sup>, Caroline K. Bundi<sup>6,7</sup>, Neema Balige<sup>4</sup>, Omar Hassan<sup>4</sup>, Catherine G. Mkindi<sup>4</sup>,  
8 Stella Rwezaula<sup>8</sup>, Thabit Athumani<sup>4</sup>, Sarah Mswata<sup>4</sup>, Nasoro S. Lilolime<sup>4</sup>, Beatus Simon<sup>4</sup>, Hania Msami<sup>4</sup>,  
9 Mohamed Mohamed<sup>4</sup>, Damiano M. David<sup>4</sup>, Latipha Mohammed<sup>4</sup>, Gloria Nyaulingo<sup>4</sup>, Bakari Mwalimu<sup>4</sup>,  
10 Omary Juma<sup>4</sup>, Tunu G. Mwamlima<sup>4</sup>, Ibrahim A. Sasamalo<sup>4</sup>, Rose P. Mkumbange<sup>4</sup>, Janeth J. Kamage<sup>4</sup>,  
11 Jordan R. Barrett<sup>1,2,3</sup>, Lloyd D. W. King<sup>1,2,3</sup>, Mimi M. Hou<sup>1,2,3</sup>, David Pulido<sup>2</sup>, Cecilia Carnrot<sup>9</sup>, Alison M.  
12 Lawrie<sup>2,10</sup>, Rachel E. Cowan<sup>1,2,3</sup>, Fay L. Nugent<sup>1,2</sup>, Rachel Roberts<sup>1,2,3</sup>, Jee-Sun Cho<sup>1,2,3</sup>, Carole A. Long<sup>5</sup>,  
13 Carolyn M. Nielsen<sup>1,2,3</sup>, Kazutoyo Miura<sup>5</sup>, Simon J. Draper<sup>1,2,3,10,\*</sup>, Ally I. Olotu<sup>4,\*</sup>, and Angela M.  
14 Minassian<sup>1,2,3,10,\*†</sup>.

15  
16 <sup>1</sup> Department of Biochemistry, University of Oxford, Dorothy Crowfoot Hodgkin Building, Oxford, OX1 3QU, UK.

17 <sup>2</sup> Centre for Clinical Vaccinology and Tropical Medicine, Jenner Institute, University of Oxford, Old Road Campus,  
18 Oxford, OX3 7LE, UK.

19 <sup>3</sup> Kavli Institute for Nanoscience Discovery, Dorothy Crowfoot Hodgkin Building, University of Oxford, Oxford,  
20 OX1 3QU, UK.

21 <sup>4</sup> Interventions and Clinical Trials Department, Ifakara Health Institute, P.O. Box 74, Bagamoyo, Tanzania.

22 <sup>5</sup> Laboratory of Malaria and Vector Research, NIAID/NIH, Rockville, MD 20852, USA.

23 <sup>6</sup> Kenya Medical Research Institute (KEMRI) Centre for Geographic Medicine Coast, KEMRI-Wellcome Trust  
24 Research Programme, Kilifi, Kenya.

25 <sup>7</sup> KEMRI-Wellcome Trust Research Programme – Accredited Research Centre, Open University, Kilifi, Kenya.

26 <sup>8</sup> Muhimbili National Hospital, Dar es Salaam, Tanzania.

27 <sup>9</sup> Novavax AB, Kungsgatan 109, SE-753 18 Uppsala, Sweden.

28 <sup>10</sup> NIHR Oxford Biomedical Research Centre, Oxford, UK.

29 #,\* These authors contributed equally.

30 † Corresponding author: Angela M. Minassian ([angela.minassian@bioch.ox.ac.uk](mailto:angela.minassian@bioch.ox.ac.uk)).

Silk SE *et al.*

31 This research was funded in part by the UK Medical Research Council (MRC) [Grant number:  
32 MR/P020593/1 and MR/K025554/1]. For the purpose of Open Access, the author has applied a CC BY  
33 public copyright licence to any Author Accepted Manuscript (AAM) version arising from this  
34 submission.

35 **Abstract**

36 **Background**

37 RH5.1 is a soluble protein vaccine candidate for blood-stage *Plasmodium falciparum* malaria, previously  
38 trialed in healthy UK adults in combination with AS01<sub>B</sub> adjuvant. Here, RH5.1 was formulated with  
39 Matrix-M™ adjuvant to assess safety and immunogenicity in a malaria-endemic adult and pediatric  
40 population for the first time.

41 **Methods**

42 We conducted a Phase 1b, single-center, dose-escalation, age de-escalation, first-in-human trial of  
43 RH5.1/Matrix-M™ in Bagamoyo, Tanzania. Healthy adults (18-45 years) and infants (5-17 months) were  
44 recruited to receive the RH5.1/Matrix-M™ vaccine candidate in a variety of dosing regimens, including  
45 monthly dosing (0-1-2 month) or delayed booster dosing (0-1-6 month) using a 10 µg dose of RH5.1, or  
46 delayed fractional booster dosing (0-1-6 month) with the first two doses of RH5.1 at 50 µg and the third  
47 dose at 10 µg. All RH5.1 protein doses were formulated with 50 µg Matrix-M™ adjuvant. Primary  
48 outcomes for vaccine safety included solicited and unsolicited adverse events after each vaccination,  
49 along with any serious adverse events (SAEs) during the study period. Secondary outcome measures for  
50 immunogenicity included the concentration and avidity of anti-RH5.1 serum IgG antibodies by ELISA  
51 and their percentage growth inhibition activity (GIA) *in vitro* against *P. falciparum* parasites using  
52 purified IgG. All participants receiving at least one dose of vaccine were included in the primary analyses.

53 **Findings**

54 Between 25<sup>th</sup> January 2021 and 15<sup>th</sup> April 2021 a total of 60 adults and infants were enrolled; 57 of these  
55 completed the vaccination series, and 55 completed 22 months of follow-up post-third vaccination.  
56 Vaccinations were well-tolerated across both age groups. There were five SAEs involving four infant  
57 participants during the trial, none of which were deemed related to vaccination. RH5-specific T cell and  
58 serum antibody responses were induced by vaccination. The anti-RH5 serum IgG responses were  
59 significantly higher in the 5-17 month old infant groups as compared to adults. Serum antibody responses

60 contracted over time post-third vaccination, but a similar hierarchy of responses across the age groups  
61 was maintained after 22 months follow-up (674 days post-third vaccination). Vaccine-induced anti-RH5  
62 antibodies showed *in vitro* GIA with comparable functional quality across all age groups and dosing  
63 regimens. The highest anti-RH5 serum IgG responses were observed post-third vaccination in the 5-17  
64 month old infants vaccinated with the 0-1-6 month delayed booster regimen using the 10 µg dose of  
65 RH5.1 (median 723 µg/mL; range: 450-1436 µg/mL), resulting in 100 % (11/11 infants) showing >60 %  
66 GIA following dilution of total IgG to 2.5 mg/mL (median 88 %; range: 73-97 %).

### 67 **Interpretation**

68 The RH5.1/Matrix-M™ vaccine candidate shows an acceptable safety and reactogenicity profile and  
69 highly promising antibody immunogenicity in 5-17 month old infants residing in a malaria-endemic area.  
70 The 0-1-6 month delayed booster regimen in 5-17 month old infants induced the highest levels of  
71 functional GIA reported to-date following human vaccination, with all infants achieving a level of GIA  
72 previously associated with protective outcome against blood-stage *P. falciparum* challenge in non-human  
73 primates. These data support onward efficacy assessment of this vaccine candidate against clinical  
74 malaria in young African infants.

### 75 **Funding**

76 The European and Developing Countries Clinical Trials Partnership (EDCTP).

### 77 **Trial Registration**

78 ClinicalTrials.gov: NCT04318002.

## 79 **Introduction**

80 Malaria is a leading global cause of disease and death despite decades of interventions. In 2022 there were  
81 249 million cases and 608,000 deaths, with over 75% of deaths occurring in children under the age of five  
82 in sub-Saharan Africa <sup>1</sup>. Despite a welcome reduction in the global burden of disease between 2000 and  
83 2015, this progress has since stalled and even reversed <sup>1</sup>. Malaria prevention services were significantly  
84 disrupted by the COVID-19 pandemic, and drug and insecticide resistance, along with conflict and  
85 climate change, together pose significant ongoing threats; highly effective vaccines thus remain urgently  
86 needed.

87 Encouragingly, two malaria vaccines targeting the sporozoite stage of *Plasmodium falciparum*,  
88 RTS,S/AS01 (Mosquirix™) and R21/Matrix-M™, have now been recommended by the World Health  
89 Organization (WHO); both vaccines have shown efficacy against clinical malaria in young African  
90 infants in Phase 3 clinical trials <sup>2,3</sup>. However, higher efficacy vaccines with improved durability remain  
91 needed, ideally without necessitating four doses. Moreover, efficacy against blood-stage infection with  
92 pre-erythrocytic vaccines requires creation and maintenance of sterile immunity, a high hurdle. Thus,  
93 addition of a complementary blood-stage vaccine strategy is attractive; such vaccines aim to prevent  
94 invasion of erythrocytes by merozoites, leading to control and clearance of blood-stage parasitemia,  
95 prevention of morbidity and reduced transmission <sup>4</sup>. Additionally, a multi-stage malaria vaccine,  
96 consisting of partially effective anti-sporozoite and anti-merozoite components, provides a potential route  
97 to achieving a highly effective intervention; whereby the blood-stage component would eliminate any  
98 parasites that escaped the first (pre-erythrocytic) line of defense.

99  
100 *P. falciparum* reticulocyte-binding protein homologue 5 (RH5) is the most advanced blood-stage vaccine  
101 candidate antigen. RH5 forms part of an invasion complex <sup>5,6</sup> and is both highly conserved and essential  
102 for invasion, where it mediates parasite binding to basigin on the erythrocyte surface <sup>7</sup>. *In vivo* protection

103 induced by RH5 vaccination was first demonstrated in an *Aotus* monkey model using a stringent  
104 heterologous *P. falciparum* challenge <sup>8</sup>. Importantly, this study demonstrated that *in vivo* protection  
105 correlated with functional antibody activity, as measured by the *in vitro* growth inhibition activity (GIA)  
106 assay, and it enabled protective threshold levels of GIA and anti-RH5 serum IgG antibody to be defined.  
107 GIA was subsequently validated as a mechanistic immune correlate in *Aotus* by passive transfer of anti-  
108 RH5 monoclonal antibody <sup>9</sup>.

109  
110 The first RH5-based vaccine candidate to enter clinical trials was a viral-vectored formulation, consisting  
111 of the recombinant replication-deficient chimpanzee adenovirus serotype 63 (ChAd63) and the attenuated  
112 orthopoxvirus modified vaccinia virus Ankara (MVA). These were delivered to healthy UK adults in an 8  
113 week prime-boost regimen (VAC057; ClinicalTrials.gov: NCT02181088). The viruses were safe and  
114 well-tolerated and elicited a functional antibody response with cross-strain *in vitro* GIA <sup>10</sup>, although the  
115 level of GIA was below the *Aotus*-defined threshold of protection. However, given that another malaria  
116 vaccine candidate based on the same ChAd63 prime-MVA boost platform <sup>11</sup> had previously been shown  
117 to elicit 10-fold higher antibody levels in African infants (the target population for *P. falciparum* malaria  
118 vaccines) as compared with UK adults, testing of the ChAd63-MVA RH5 candidate in a malaria-endemic  
119 setting was warranted. A Phase 1b age de-escalation, dose escalation trial was therefore subsequently  
120 undertaken in Tanzania (VAC070; NCT03435874). This showed that the same viral-vectored RH5  
121 vaccine candidate induced 10-fold higher anti-RH5 IgG responses in Tanzanian 6-11 month old infants as  
122 compared with UK adults, thus achieving the highest levels of functional GIA reported following human  
123 malaria vaccination at the time <sup>12</sup>. In an attempt to optimize antibody quantity further, a full-length RH5  
124 soluble protein vaccine, called RH5.1, was subsequently developed <sup>13,14</sup> and initially trialled in UK adults  
125 in a Phase 1/2a trial with GlaxoSmithKline's (GSK's) AS01<sub>B</sub> adjuvant (VAC063; NCT02927145). This  
126 induced 10-fold higher antibody levels as compared to the viral-vectored RH5 in UK adults <sup>15</sup>. Anti-RH5  
127 serum IgG responses in UK adults were also more durable when the third dose was delivered at 6 months

128 and at one-fifth of the initial dose (a so-called “delayed fractionation” (DFx) regimen), as compared to  
129 responses seen after three full (identical) doses given one month apart <sup>15</sup>.

130  
131 Here we report a Phase 1b clinical trial in Tanzanian adults and infants [VAC080; NCT04318002] that  
132 was therefore designed to assess the safety and immunogenicity of the RH5.1 soluble protein vaccine  
133 candidate, now formulated with Matrix-M™ adjuvant from Novavax. Following first-in-human safety  
134 assessment of this new formulation in adults, three different dosing regimens were assessed in the target  
135 infant population, 5-17 months of age (to align with delivery of R21/Matrix-M™ and RTS,S/AS01). This  
136 trial was designed to assess whether the levels of anti-RH5 serum IgG and functional GIA associated with  
137 a protective outcome in the *Aotus* monkey – *P. falciparum* challenge model could also be achieved in  
138 vaccinated African infants, and thereby inform decision-making on the progression of this RH5-based  
139 vaccine candidate to Phase 2b field efficacy testing.

140 **Results**

141 **Study recruitment and vaccinations**

142 The VAC080 Phase 1b trial was conducted in the Bagamoyo district of Tanzania. Malaria incidence in  
143 the district was estimated to range from 539 cases per 1000-person years in higher transmission areas to  
144 76 cases per 1000-person years in lower transmission areas in 2020 <sup>16</sup>. The protocol recruitment plan was  
145 to recruit two groups of healthy adults (aged 18-45 years) and three groups of 5-17 month old infants  
146 from Bagamoyo town, an area of relatively low malaria transmission within the district. The study was  
147 also designed to include a fourth infant group with relatively higher malaria pre-exposure, to assess for  
148 potential impact of prior malaria exposure on the immunogenicity of the RH5.1 /Matrix-M™ vaccine  
149 candidate. 185 participants were screened and 60 of these (N=12 adults and N=48 infants) were enrolled  
150 into the VAC080 Phase 1b trial (**Figure 1**). Prior to study start, an anti-parasite serological assay was  
151 established to provide a relative assessment of previous malaria exposure in the 5-17 month old infant age  
152 group. Serum IgG responses to parasite lysate of infants living in both urban (Dunda and Magomeni,  
153 N=90) and rural (Yombo and Fukayosi, N=15) wards within Bagamoyo district were used to define  
154 relative “low” versus “high” malaria pre-exposure thresholds relevant to this study population (**Figure**  
155 **S1A**). Within the infant cohort, 156 were tested for anti-parasite lysate responses during screening  
156 (**Figure S1B**), with N=36 recruited from those defined as relatively “low” prior malaria exposure and  
157 N=12 recruited from those defined as relatively “high” prior malaria exposure (**Figure S1C**).

158  
159 Vaccinations began on 25th January 2021 and all 22 month post-third vaccination follow-up visits were  
160 completed by 27th July 2023. Group allocation was open label and non-randomized and enrolment  
161 proceeded in a dose escalation and age de-escalation fashion. Independent safety reviews were conducted  
162 by the Data Safety and Monitoring Board (DSMB) between every age de-escalation and dose-escalation  
163 step in the protocol. All vaccinations were administered via the intramuscular route in the deltoid and, in  
164 every case, the indicated dose of RH5.1 protein was formulated prior to injection with 50 µg Matrix-M™



165 adjuvant. Recruitment began with six adults in group “Adults 10M” who received 10 µg RH5.1 at 0, 1  
166 and 2 months (monthly regimen), followed by six adults in group “Adults DFx” who received 50 µg  
167 RH5.1 at 0 and 1 months and 10 µg RH5.1 at 6 months (delayed-fractional regimen; DFx). Following a  
168 safety review, the four groups of twelve 5-17 month old infants were enrolled. Those in group “Infants  
169 10M” (monthly regimen) and group “Infants 10D” (10 µg RH5.1 at 0, 1 and 6 months; delayed regimen)  
170 were recruited in parallel first, followed by group “Infants DFx”, who received the DFx regimen. Finally  
171 the group “High Infants DFx” was recruited as the relatively higher malaria pre-exposure cohort, and they  
172 also received the DFx regimen. Two participants in the “High Infants DFx” cohort were recruited with  
173 anti-parasite lysate IgG slightly below the serological threshold (**Figure S1C**); following a review they  
174 continued to receive the remaining vaccinations and study visits as scheduled.

175  
176 The median age of adult participants was 23.5 years (range 20-30 years) and the median age of infant  
177 participants was 12 months (range 5-17 months), with comparable ranges across the groups (**Figure S2**).  
178 Similar numbers of males and females were enrolled across the infant age groups, however, although  
179 there were no sex-based exclusion criteria, no adult female participants were screened or recruited. There  
180 were three withdrawals during the vaccination period. Two participants withdrew after the first study  
181 vaccination, one in “Adults 10M” and one in “High Infants DFx”, and one participant in “Infants 10D”  
182 withdrew after the second vaccination. One withdrawal was due to the participant moving out of the study  
183 area and none were related to adverse experiences with study procedures. All other participants received  
184 the study vaccinations as scheduled. Two infant participants died during the post-vaccination follow-up  
185 period for reasons unrelated to the study or the study vaccinations as detailed below. All other participants  
186 completed follow-up out to 22 months post-final vaccination.

187

188 **Outcomes and estimation**

189 **Reactogenicity and safety**

190 There were no safety concerns during the course of the trial. The majority of local solicited adverse events  
191 (AEs) in both adults and infants were graded as mild to moderate in severity (**Figure 2**). Severe local  
192 solicited AEs were reported in one adult and three infant participants. The most common local solicited  
193 AE across all groups was swelling, reported after 18 % of vaccine doses (32/175 doses); this mainly  
194 occurred after the second and third doses and was mild (11 %; 19/175 doses), moderate (7 %; 12/175) or  
195 severe (1 %; 1/175) in graded severity. A slightly higher proportion of participants receiving the higher 50  
196 µg dose of RH5.1 (those in groups “Adults DFx”, “Infants DFx” and “High Infants DFx”) experienced  
197 local solicited AEs of moderate to severe grade (14 %; 12/88 doses) compared to the lower dose groups  
198 (10 %; 9/87). Severe swelling and induration occurred in one adult participant from the lower dose group  
199 (“Adults 10M”) after the final vaccine administration; this resolved spontaneously within 7 days. All  
200 other local AEs in adults resolved by 72 hours post-vaccine administration. In the two infant DFx regimen  
201 groups, three infants developed severe and one developed moderate induration after receiving their final  
202 delayed dose. The majority of local solicited AEs in infants resolved within 72 hours post-vaccination,  
203 and all resolved by day 8.

204  
205 The majority of systemic solicited AEs were mild in severity, and there were no severe systemic solicited  
206 AEs reported (**Figure 2**). The most frequent systemic solicited AEs were mild subjective fever and mild  
207 objective fever, reported after 18 % (31/175) and 7 % (12/175) of vaccinations, respectively, occurring  
208 only in infants. One case of moderate severity subjective fever and one case of moderate severity  
209 objective fever were reported in the higher dose infant groups after receiving the second study  
210 vaccination. Vomiting, diarrhea, reduced oral intake and reduced activities were also experienced by  
211 infants only and were all of mild severity. All systemic AEs reported by adult participants were mild in  
212 severity, except for one participant who reported moderate grade headache on day one following both the

213 first and second study vaccinations. In adults, most systemic solicited AEs resolved within 48 hours after  
214 vaccination and in infants most systemic solicited AEs resolved within 72 hours of vaccine  
215 administration. All systemic solicited AEs resolved by day 8.

216  
217 Unsolicited AEs deemed at least possibly related to study interventions were all of mild or moderate  
218 severity (**Figure S3**). There was only one unsolicited AE in the adult groups – one participant reported an  
219 episode of mild dizziness six days following the third study vaccination which resolved spontaneously on  
220 the same day. There were five different unsolicited AEs in infants; all resolved within 8 days with the  
221 exception of one participant who was diagnosed with a helminth infection which was deemed probably  
222 related to vaccination due to the temporal association with study vaccination and lasted for 53 days. All  
223 unsolicited AEs had resolved by the end of the study period.

224  
225 There were five serious adverse events (SAEs) involving four infant participants during the trial, none of  
226 which were deemed related to vaccination (**Figure S4**). Two of the five SAEs had a fatal outcome: one  
227 infant with stage IV neuroblastoma and one infant with acute respiratory failure secondary to herbal  
228 intoxication. The independent trial DSMB was informed of both cases and determined there was no  
229 relationship to study vaccinations. There were no AEs of special interest (AESIs) or suspected unexpected  
230 serious adverse reactions (SUSARs) during the course of the trial.

231  
232 The most frequent laboratory abnormality identified in the 28-day post-vaccination period in adults was  
233 lymphopenia, occurring in 17 % (1/6) of “Adults 10M” participants and 33 % (2/6) of “Adults DFx”  
234 participants (**Figure S5**). All laboratory AEs occurring during this period in adults were mild in graded  
235 severity and resolved by the end of the study period, apart from one participant who had mild  
236 lymphopenia when they withdrew following their day 14 visit (post-first vaccination). The most frequent  
237 laboratory abnormality identified in the 28-day post-vaccination period in infants was anemia, occurring

238 in 58 % of participants (7/12) in the “Infants 10M”, “Infants 10D” and “Infants DFx” groups, and in 42 %  
239 (5/12) in the “High Infants DFx” group. The maximum severity of anemia was moderate grade and in all  
240 cases had resolved by the final study visit (maximum duration 154 days). The majority of other laboratory  
241 AEs occurring during this period in infants were mild to moderate and all had resolved by the final study  
242 visit.

243  
244 There were three severe grade laboratory AEs in infants in the 28 days following vaccination (**Figure S5**).  
245 One participant in the “High Infants DFx” group developed severe neutropenia at 7 days post-second  
246 vaccination which was temporally associated with a diagnosis of eczema with superimposed bacterial  
247 infection. This had improved to mild by day 14 and resolved completely by the third vaccination. One  
248 participant in the “Infants 10D” group developed severe neutropenia at 7 days post-second vaccination  
249 which resolved by day 14 and was temporally associated with a diagnosis of pneumonia. One participant  
250 in the “High Infants DFx” group developed severe eosinophilia at 7 days post-third vaccination which  
251 persisted at moderate grade until 28 days post-vaccination and had resolved by 84 days. There were no  
252 symptoms suggestive of allergy and stool microscopy did not show any evidence of helminth infection.  
253 This infant was well throughout this time period with no concerns apart from an isolated episode of fever  
254 on day 22.

255  
256 All participants tested negative for malaria by microscopy at screening and were subsequently tested by  
257 microscopy at the second and third vaccination visits and monthly thereafter. Two participants in the  
258 “High Infants DFx” group (with higher prior malaria exposure) tested positive during study visits in the  
259 follow-up period (at 4 and 12 months post-third vaccination); these participants were clinically well and  
260 received anti-malarial treatment in the community. In addition, one participant in the “Infants DFx” group  
261 tested positive for malaria outside of the study during chemotherapy for neuroblastoma (see above section  
262 on SAEs).

263

## 264 **Immunogenicity**

265 The magnitude of the serum anti-RH5 IgG antibody response was measured over time by ELISA against  
266 full-length RH5 (RH5.1) recombinant protein. Almost all participants showed background level responses  
267 at baseline (data not shown); consistent with numerous other immuno-epidemiological data that suggest  
268 RH5 is not a dominant target of naturally-acquired malaria immunity<sup>10,17,18</sup>. Fourteen days following two  
269 vaccinations (denoted “V2+14”) of either 10 µg or 50 µg RH5.1 formulated with Matrix-M™ adjuvant,  
270 responses were comparable across the two doses within the adult or infant cohorts (**Figure 3A,B**).  
271 However, the magnitude of the antibody response showed a clear age-dependence, with significantly  
272 higher responses observed in the 5-17 month old infants (**Figure S6A**); here the adult cohorts showed  
273 median responses ranging from 38-52 µg/mL anti-RH5.1 IgG compared to the infant cohorts with ~4-5  
274 fold-higher median responses ranging from 200-230 µg/mL.

275

276 Responses then declined over time and were significantly lower prior to the third vaccination (V3) in all  
277 participants receiving the delayed or delayed-fractional boost at month 6, as compared to those receiving  
278 a final boost at month 2 (**Figure 3A,B**). Subsequently, 14 days following the third dose (V3+14; day 70  
279 for monthly cohorts and day 196 for delayed and delayed-fractional cohorts), significantly higher  
280 responses (~2-3-fold) were maintained in the 5-17 month old infants, as compared to adults, regardless of  
281 vaccination with either the monthly or DFx regimen (**Figure S6B**). Here, within the adult groups,  
282 responses were moderately but significantly higher at V3+14 in those receiving the DFx as compared to  
283 10M regimen, with median responses of 138 µg/mL and 81 µg/mL, respectively (**Figure 3A**). In contrast,  
284 responses at V3+14 in the 5-17 month old infants receiving these same two regimens were comparable,  
285 with median responses at ~290 µg/mL (**Figure 3B**). There was also no difference in the serum anti-RH5  
286 IgG response at any time-point between the two infant cohorts who received the same DFx regimen, but  
287 who differed in baseline malaria pre-exposure status (**Figure 3C**). However, in contrast, the infants

288 receiving the 10D regimen showed significantly higher responses, reaching a median of 723  $\mu\text{g/mL}$ , with  
289 all infants in this group showing anti-RH5 serum IgG responses at the V3+14 time-point above the level  
290 associated with protection against *P. falciparum* blood-stage challenge in *Aotus* monkeys <sup>8</sup> (**Figure 3B**).

291  
292 To further explore immune responses following the third vaccination, we also assessed the avidity of the  
293 anti-RH5 serum IgG response and the induction of RH5-specific IFN- $\gamma$  T cell responses. Here, delayed  
294 and Dfx boosting, as opposed to monthly boosting, were both associated with significantly more avid  
295 anti-RH5 IgG responses in adults and infants (**Figure S7**). In contrast, the anti-RH5 IFN- $\gamma$  T cell  
296 response, as assessed by *ex-vivo* ELISpot assay <sup>15</sup>, was comparable across all groups, regardless of age or  
297 vaccination regimen (**Figure S8**).

298  
299 Anti-RH5 serum IgG antibody responses subsequently declined over time (**Figure S6C**), but a similar  
300 pattern of immunogenicity to the peak response was maintained at ~1 year post-third vaccination  
301 (V3+309), although no significant differences were observed at ~2 years (V3+674) between the monthly  
302 and Dfx regimens within the adult and infant cohorts (**Figure 3A,B**). The highest responses were  
303 maintained at V3+674 in the Infants 10D cohort, with a median of 65  $\mu\text{g/mL}$ ; these were significantly  
304 higher than those in the Infants 10M cohort with median of 16  $\mu\text{g/mL}$  (**Figure 3B**).

305  
306 Serum samples were next analyzed for *in vitro* functional anti-parasitic activity at the GIA Reference  
307 Center (NIAID/NIH). Purified total IgG was normalized to a starting concentration of 10 mg/mL and  
308 tested against *P. falciparum* (3D7 clone) parasites using the standardized single-cycle GIA assay.  
309 Samples at baseline (pre-vaccination) were negligible (<20 % GIA), with a single exception of one adult  
310 who had 58 % GIA (**Figure 4A**), however large increases in overall GIA were observed post-  
311 RH5.1/Matrix-M™ vaccination (**Figure 4B**). Here, at the V3+14 time-point (14 days post-dose 3) and  
312 using 10 mg/mL total IgG, median levels ranged from 83-87 % and 95-98 % GIA across the adult and

313 infant groups, respectively. All total IgG samples with >40 % GIA at 10 mg/mL were subsequently  
314 titrated using a 2-fold dilution series in the assay (**Figure S9A**). The overall levels of GIA mirrored the  
315 previous serology, with infants overall showing higher levels of GIA as compared to adults and as  
316 measured using 2.5 mg/mL total purified IgG. Moreover, the infants vaccinated with the 10D regimen  
317 showed the highest levels of GIA, significantly outperforming the 10M and Dfx regimens tested in the  
318 other infant groups (**Figure 4C**). There were also no differences seen in the levels of GIA between the  
319 two infant cohorts who differed in baseline malaria pre-exposure status and received the same Dfx  
320 regimen (**Figure 4D**).

321  
322 The GIA showed a strong relationship to the concentration of RH5.1-specific IgG present in the total IgG  
323 used in the assay and as measured by ELISA (**Figure 4E**). The concentration of RH5.1-specific  
324 polyclonal IgG required to give 50 % GIA ( $EC_{50}$ ) was highly comparable across all the groups (regardless  
325 of age, vaccine regimen and malaria pre-exposure status at baseline). Analysis across all groups combined  
326 showed a GIA  $EC_{50}$  = 14.3  $\mu$ g/mL (95% CI: 13.4-15.2  $\mu$ g/mL). This functional “quality” readout of the  
327 RH5.1/Matrix-M™ vaccine candidate, i.e. the concentration of antigen-specific IgG required to achieve  
328 50 % GIA, was consistent with our previously reported data following vaccination of healthy volunteers  
329 in the UK or Tanzania with viral-vectored RH5 or RH5.1/AS01<sub>B</sub><sup>10,12,15</sup> (**Figure S9B**).

330  
331 We previously reported an association between the *in vitro* GIA assay and *in vivo* protection outcome  
332 following RH5 vaccination and *P. falciparum* blood-stage challenge in *Aotus* monkeys, with protected  
333 animals showing >60 % GIA at 2.5 mg/mL purified IgG<sup>8,9</sup>. A similar association was observed in a  
334 controlled human malaria infection (CHMI) trial in healthy UK adults vaccinated with RH5.1/AS01<sub>B</sub>,  
335 although this threshold level of GIA was not reached in that study<sup>15</sup>. Notably, in the VAC080 trial, all  
336 four groups of vaccinated infants showed median levels of GIA at 2.5 mg/mL total IgG over the level of  
337 60 % GIA (**Figure S10A**). The Infants 10D group showed the highest median level of GIA at 88 % with

Silk SE *et al.*

338 all participants (11/11) above the 60 % GIA target threshold at day 14 following the third vaccination  
339 **(Figure 4C)**. This level of GIA is the highest level of functional GIA achieved following human  
340 vaccination to date **(Figure S10B)**.



341 **Discussion**

342 Here we report a dose-escalation, age de-escalation, first-in-human clinical trial of the RH5.1/Matrix-M™  
343 vaccine candidate, assessed in a malaria-endemic population. These data in healthy Tanzanian adults and  
344 5-17 month old infants show that this adjuvanted protein subunit vaccine formulation has a favorable  
345 safety and reactogenicity profile, highly comparable to data from Phase 1b malaria vaccine trials using the  
346 R21 immunogen formulated with the same Matrix-M™ adjuvant<sup>19,20</sup>. Independent review concluded  
347 none of the five SAEs (involving four infant participants) that occurred during the trial, including two  
348 with fatal outcomes, were related to vaccination (see **Supplementary Information**). These occurred  
349 against a similar backdrop child mortality rate (aged 1-5 years) of 26.5/1000 and infant mortality rate  
350 (aged 0-1 years) of 53.0/1000 in Bagamoyo District as last recorded in 2012<sup>21</sup>. Including this trial, safety  
351 data have now been reported for 193 healthy volunteers (109 adults, 18 children and 66 infants)  
352 vaccinated with RH5-based vaccines<sup>10,12,15</sup>, all showing similar safety and tolerability profiles, whilst  
353 Matrix-M™ adjuvant is now a component in vaccines for malaria and Covid-19 that are licensed for  
354 human use<sup>3,22</sup>. On-going Phase 1/2 trials, including a Phase 2b efficacy trial in >200 infants 5-17 months  
355 of age (VAC091; NCT05790889), continue to monitor the safety of RH5.1/Matrix-M™ vaccination.

356  
357 The RH5.1/Matrix-M™ vaccine candidate was immunogenic for anti-RH5 IFN- $\gamma$  T cell responses and  
358 serum IgG antibody across all age groups and dosing regimens. The levels of peripheral T cell response  
359 observed by ELISPOT assay were not dissimilar to those previously reported in UK adults immunized  
360 with the RH5.1/AS01<sub>B</sub> formulation using the same dosing regimens<sup>15</sup>. While the contribution of IFN- $\gamma$ -  
361 secreting T cells to RH5-mediated malaria immunity in humans remains unclear, it is likely that RH5-  
362 specific CD4<sup>+</sup> T cells are needed to help B cell responses. Indeed, previous work in UK adults has shown  
363 RH5.1/AS01<sub>B</sub> can induce RH5-specific circulating T follicular helper (Tfh) cell responses and that these  
364 correlate with both RH5-specific memory B cells and serum antibody<sup>23</sup>. Work remains on-going to

365 investigate B and Tfh cell response phenotypes in the Tanzanian infant population vaccinated here with  
366 RH5.1/Matrix-M™.

367

368 Priming of Tanzanian adults with two doses of 10 or 50 µg RH5.1 formulated with 50 µg Matrix-M™  
369 led to similar anti-RH5 serum IgG responses two weeks after the second dose. Notably, however,  
370 following the third dose, the 0-1-6 month DFx regimen induced significantly more avid and higher levels  
371 of anti-RH5 serum IgG, as compared to the 0-1-2 monthly regimen; consistent with our previous  
372 observations in UK adults vaccinated with the same dosing regimens of RH5.1 with AS01<sub>B</sub> adjuvant<sup>15</sup>.  
373 These serum IgG responses were better maintained over time in the DFx regimen vaccinees for at least  
374 ~1 year following the third dose, although responses declined by ~2 years. In line with this, we have also  
375 reported enhanced circulating RH5-specific memory B cell responses in adults vaccinated with the DFx  
376 (as opposed to monthly) dosing regimen, along with a higher frequency of RH5-specific (and putatively  
377 long-lived) plasma cells in the bone marrow that correlated strongly with the serum anti-RH5 IgG  
378 response<sup>24,25</sup>.

379

380 Interestingly, these observations in adult vaccinees were only partly replicated in the 5-17 month old  
381 infants. Responses were again similar two weeks after the second vaccination, regardless of RH5.1  
382 protein priming dose, however, following the third vaccination the monthly and DFx regimens performed  
383 comparably, whereas significantly higher anti-RH5 serum IgG responses were induced in those infants  
384 receiving a delayed, but not fractionated dose, of RH5.1 protein at 6 months. The underlying reasons for  
385 this improvement with the delayed, as opposed to DFx, regimen remain to be determined, although  
386 circulating levels of vaccine-specific antibody may affect vaccine responsiveness<sup>26</sup> and this cohort  
387 primed twice with 10 µg RH5.1 with Matrix-M™ showed lower anti-RH5 serum IgG responses at the  
388 time of third vaccination (month 6) as compared to those in the DFx regimen group who were primed  
389 twice with a higher 50 µg RH5.1 dose. In line with our observations here, trials of RTS,S/AS01 showed

390 improved outcome measures with a DFx regimen, as opposed to 0-1-2 monthly dosing, in healthy US  
391 adults <sup>27</sup>, however no improvement in field efficacy when tested in 5-17 month old infants <sup>28</sup>. Notably,  
392 these DFx regimens tested with RTS,S/AS01 fractionated the dose of adjuvant and antigen, unlike our  
393 trials where a fractionated dose of antigen is delivered in a full dose of adjuvant. Nevertheless, our data  
394 suggest a delayed boosting, as opposed to DFx, regimen may be more optimal in this younger age group  
395 and this warrants further investigation.

396  
397 Regardless of vaccination regimen, peak anti-RH5 serum IgG responses in the 5-17 month old infants  
398 were significantly higher than those induced in adults – a phenomenon now consistently observed with  
399 numerous other malaria subunit vaccine candidates including viral-vectored and recombinant antigen-in-  
400 adjuvant formulations such as R21/Matrix-M<sup>TM</sup> <sup>11,12,19,29,30</sup>. These data bode well for future assessment of  
401 multi-stage malaria vaccine strategies, whereby a blood-stage RH5 component could be trialed in  
402 combination with the licensed pre-erythrocytic vaccines. The very high levels of anti-RH5 serum IgG  
403 induced in the 5-17 month old infants translated into the highest levels of functional GIA observed in  
404 human vaccinees to-date. Indeed, overall GIA largely mirrored the serological responses, and all infants  
405 vaccinated with the 0-1-6 month delayed boost regimen (who averaged ~700 µg/mL RH5-specific IgG at  
406 the peak of the response) exceeded the threshold level of *in vitro* GIA that our work has previously  
407 associated with a protective outcome in *Aotus* monkeys challenged with blood-stage *P. falciparum* <sup>8,9</sup>.  
408 Importantly, this GIA threshold was also reached in 75% of infants vaccinated with the 0-1-2 month  
409 regimen, suggesting RH5 vaccination could be aligned with the current delivery schedule for the primary  
410 series of RTS,S/AS01 and/or R21/Matrix-M<sup>TM</sup>. The functional quality of serum antibody induced by  
411 RH5.1/Matrix-M<sup>TM</sup> (i.e. GIA per µg anti-RH5 IgG) was also highly similar across all age groups and  
412 vaccination regimens tested here, and also highly similar to that reported in all previous clinical trials of  
413 vaccine candidates based on the full-length RH5 molecule <sup>10,12,15</sup>. Consistent with previous observations  
414 using RH5.1/AS01<sub>B</sub> in UK adults <sup>15,25</sup>, all the delayed booster regimens tested here in adults and infants

415 also showed improvement in the avidity of anti-RH5 serum IgG, however, this did not impact the  
416 functional quality of these IgG in the assay of GIA. These observations have now been explained by  
417 analysis of anti-RH5 human mAbs that showed delayed boosting leads to improvement in the anti-RH5  
418 antibody dissociation rates, but not in the antibody association rates which are strongly correlated with  
419 GIA potency<sup>31</sup>.

420  
421 Previous work on historical blood-stage vaccine candidates targeting the AMA1 antigen suggested that  
422 naturally-occurring anti-malarial antibody responses could interfere with vaccine-induced IgG<sup>32</sup>, whilst  
423 other studies have suggested such antibodies may interact additively or synergistically with anti-RH5 IgG  
424 in terms of GIA<sup>33</sup>. We therefore also assessed the DFx regimen in 5-17 month old infants who had  
425 experienced relatively higher levels of malaria exposure prior to study recruitment. Our data indicated no  
426 apparent impact of these anti-malarial responses on RH5.1/Matrix-M<sup>TM</sup> immunogenicity or functional  
427 GIA. Whether much higher levels of existing anti-malarial natural immunity at the time of RH5 vaccine  
428 priming may enhance or interfere with vaccine outcomes now remains to be determined in larger field  
429 trials at sites of higher malaria endemicity.

430  
431 The main limitations of this trial were the relatively small numbers of participants recruited from an area  
432 of low to moderate malaria transmission, and that in the adult groups only males volunteered to  
433 participate. Nonetheless, the very high levels of GIA achieved in this trial indicate that a 0-1-6 month  
434 delayed boost regimen with RH5.1/Matrix-M<sup>TM</sup> may protect the 5-17 month old target population against  
435 blood-stage *P. falciparum* malaria. In light of this, the RH5.1/Matrix-M<sup>TM</sup> vaccine candidate has since  
436 progressed to a Phase 2b field efficacy trial in Burkina Faso (VAC091; NCT05790889) to assess efficacy  
437 against clinical malaria following monthly or delayed boost vaccination.

438 **Methods**

439 **Study Design**

440 The VAC080 trial was an open-label, age de-escalation, dose-escalation study, conducted according to the  
441 principles of the current revision of the Declaration of Helsinki 2013 and in full conformity with the ICH  
442 guidelines for Good Clinical Practice (GCP). It was approved by the Oxford Tropical Research Ethics  
443 Committee in the UK (reference 9-20), and the following authorities in Tanzania: the Ifakara Health  
444 Institute Institutional Review Board (reference 49-2020), the National Institute for Medical Research, the  
445 National Health Research Ethics Sub-Committee and the Tanzania Medicines and Medical Devices  
446 Authority (reference TMDA0020/CTR/0006/01). The VAC080 trial was registered on ClinicalTrials.gov  
447 (NCT04318002). The study was conducted at Ifakara Health Institute Clinical Trial Facility, Bagamoyo  
448 Research and Training Centre, Tanzania.

449  
450 We report here the safety, reactogenicity and immunogenicity profile of vaccination with the RH5.1  
451 protein<sup>14</sup> given with 50 µg Matrix-M™ adjuvant (Novavax) in monthly, delayed and delayed-fractional  
452 regimens up until 674 days (22 months) post-final study vaccination. The Consolidated Standards of  
453 Reporting Trials (CONSORT) guidelines were followed.

454

455 **Participants**

456 Healthy adults (18-45 years) and infants (5-17 months) residing in Bagamoyo District, Tanzania, with a  
457 negative malaria blood film at screening, were eligible for inclusion in the study. Enrolment was into six  
458 groups (two adult and four infant groups) according to age, timing of enrolment and malaria pre-exposure  
459 status (infants only). A full list of inclusion and exclusion criteria are listed in the study protocol which is  
460 included within the Supplementary Appendix.

461

462 Each participant (or guardian) signed or thumb-printed an informed consent form at the in-person  
463 screening visit and consent was verified before each vaccination. The independent DSMB periodically  
464 reviewed the study progress and safety data according to a safety review schedule, including prior to each  
465 age de-escalation or dose escalation step.

466

## 467 **Procedures**

### 468 **Safety Analysis**

469 Following each vaccination, each participant was visited at home on days 1 (infants only), 3, 4, 5 and 6 by  
470 a community health worker for assessment and any solicited and unsolicited AEs were recorded. At days  
471 1 (adults only), 2, 7, 14 and 28 post-vaccination, participants were seen at the clinical research facility. In  
472 addition, participants attended the facility for follow-up on days 84, 112, 309 and 674 post-third  
473 vaccination. Solicited AEs were collected at visits up to 7 days post-vaccination and unsolicited AEs were  
474 collected at visits up to 28 days post-vaccination. SAEs were collected at all visits. Observations (heart  
475 rate, temperature and blood pressure measurements) were taken at the clinic visits from the day of  
476 vaccination until day 84 post-third vaccination. Blood tests for exploratory immunology were taken at all  
477 visits except those occurring 2 days after each vaccination and 7 days after the first vaccination. Blood  
478 samples for safety (full blood count, alanine aminotransferase and creatinine) were carried out at  
479 screening and at all clinic visits except those occurring on days 1-2 post-vaccination and on 28 days post-  
480 second vaccination for the delayed regimen groups.

481

482 Solicited AEs were defined as being at least possibly related to vaccination. The likely causality and  
483 grading of unsolicited AEs and SAEs were assessed as described in the protocol. Unsolicited AEs were  
484 classified according to MedDRA (version 26.0).

485

486 **Outcomes**

487 Primary outcome measures for vaccine safety included solicited and unsolicited AEs after each  
488 vaccination, along with any SAEs during the study period. The primary outcome analysis was conducted  
489 on the safety analysis population which included participants who received at least the first dose of  
490 vaccine in the study. Solicited AEs were collected for seven days after each study vaccination and the  
491 maximum severity reported for each solicited systemic and local AE by each participant after each  
492 vaccination was summarized by group. Unsolicited AEs were collected for 28 days after each study  
493 vaccination and those deemed at least possibly related to study vaccination are reported. SAEs were  
494 collected for the entire study period and all SAEs, regardless of causality, are reported.

495  
496 The secondary outcome measures for immunogenicity were the concentration and avidity of anti-RH5.1  
497 serum IgG antibodies by ELISA and their percentage GIA *in vitro* using purified IgG, as well as cellular  
498 immunogenicity to RH5.1 as measured by ELISPOT and/or (reported elsewhere) flow cytometry.

499  
500 Exploratory outcome measures included the assessment of the frequency of RH5-specific plasma cells  
501 from bone marrow aspirates at baseline and 4 weeks post-third vaccinations, reported elsewhere <sup>24</sup>.

502

503 **Vaccines**

504 The design, production and preclinical testing of RH5.1 has been reported previously in detail <sup>13,14</sup>.  
505 Briefly, RH5.1 is a soluble protein immunogen based on the full-length *P. falciparum* reticulocyte-  
506 binding protein homologue 5 (RH5). The protein is produced by secretion from *Drosophila melanogaster*  
507 Schneider-2 cells. RH5.1 was developed at the University of Oxford and an initial batch produced to  
508 Good Manufacturing Practice (GMP) by the Clinical Biomanufacturing Facility in Oxford.

509

510 Matrix-M™ adjuvant was manufactured by Novavax AB (Uppsala, Sweden). It is a potent, saponin-based  
511 adjuvant and comprises of partially-purified extracts of the bark of the *Quillaja saponaria* Molina tree,  
512 phosphatidylcholine and cholesterol. Matrix-M™ has demonstrated a favorable safety profile, as well as  
513 enhancement of cellular and humoral immune responses to a range of vaccine candidates and is licensed  
514 for human use in other malaria and Covid-19 vaccines <sup>3,22</sup>.

515

### 516 **Peripheral Blood Mononuclear Cell (PBMC), Plasma and Serum Preparation**

517 Blood samples were collected into lithium heparin-treated vacutainer blood collection systems (Becton  
518 Dickinson, UK). PBMC were isolated and used within 6 h in fresh assays as previously described <sup>34</sup>.  
519 Excess cells were frozen in fetal calf serum (FCS) containing 10 % dimethyl sulfoxide and stored in  
520 liquid nitrogen. Plasma samples were stored at -80 °C. For serum preparation, using untreated  
521 vacutainers, blood samples were stored at room temperature and then the clotted blood was centrifuged  
522 for 5 min (1000 *xg*). Serum was stored at -80 °C.

523

### 524 **Anti-parasite Lysate ELISA**

525 Serum antibody levels to parasite lysate were assessed by standardized ELISA methodology previously  
526 described <sup>12,16,35</sup>. Schizont extract from *P. falciparum* (3D7 clone) parasites produced by the GIA  
527 Reference Laboratory, NIAID, NIH, was adsorbed overnight at 4 °C to 96 well NUNC-Immuno Maxisorp  
528 plates (Thermo Fisher Scientific) at an equivalent of 5x10<sup>2</sup> parasites per µL. Test sera were diluted in 1 %  
529 milk in Dulbecco's phosphate buffered saline (DPBS) and added in triplicate to plates following blocking  
530 with 5 % milk in DPBS (Sigma). A reference standard and internal control samples from a pool of N=34  
531 "high" malaria pre-exposed serum samples, from the Bagamoyo Clinical Trial Facility-Ifakara Health  
532 Institute (BCTF-IHI) Biobank, plus blank wells, were included. Use of these samples received ethical  
533 approval from the Ifakara Health Institute Institutional Review Board (IHI/IRB/No: 49-2020). Bound  
534 antibodies were detected using goat anti-human IgG conjugated to alkaline phosphatase (Sigma),



535 developed using 4-nitrophenyl phosphate disodium salt hexahydrate (Sigma) and absorbance at 405 nm  
536 (OD<sub>405</sub>) was determined on a BioTek Elx808 reader with Gen5 software. Antibody units were assigned  
537 using the reciprocal dilution of the standard giving an optical density of 1.0 at OD<sub>405</sub>. The standard curve  
538 and Gen5 software v3.04 (Agilent) were then used to convert the OD<sub>405</sub> of test samples to arbitrary units  
539 (AU). “Low” and “high” malaria pre-exposure thresholds were first defined at <25<sup>th</sup> percentile (20 AU)  
540 and >75% percentile (85 AU) of all N=105 population test samples. However, due to a large number of  
541 screening failures making recruitment difficult these were redefined as <75% percentile (71 AU) from  
542 “urban” wards, Magomeni and Dunda, and >60% percentile (140 AU) from “rural” wards, Fukayosi and  
543 Yombo, within Bagamoyo district. These criteria maintained a clear difference in anti-malarial antibody  
544 levels between the two cohorts.

545

#### 546 **RH5 ELISA**

547 Anti-RH5 total IgG ELISAs were performed against full-length RH5 protein (RH5.1) using standardized  
548 methodology as previously described<sup>10,12,15</sup>. The reciprocal of the test sample dilution giving an OD<sub>405</sub> of  
549 1.0 in the standardized assay was used to assign an ELISA unit value of the standard. A standard curve  
550 and Gen5 ELISA software v3.04 (BioTek, UK) were used to convert the OD<sub>405</sub> of individual test samples  
551 into AU. These responses in AU are reported in µg/mL following generation of a conversion factor by  
552 calibration-free concentration analysis as reported previously<sup>10</sup>.

553

#### 554 **Avidity ELISA**

555 Anti-RH5.1 IgG antibody avidity was assessed by sodium thiocyanate (NaSCN)-displacement ELISA  
556 using previously described methodology<sup>10,15</sup>. The concentration of NaSCN required to reduce the  
557 OD<sub>405</sub> to 50% of that without NaSCN was used as a measure of avidity (IC<sub>50</sub>).

558

559 **Assay of Growth Inhibition Activity (GIA)**

560 Standardized assays were performed by the GIA Reference Center, NIH, USA, using previously  
561 described methodology<sup>36</sup>. Each sample was tested in three independent replication assays using three  
562 different batches of red blood cells (RBC), and the median of these three results was used to generate the  
563 final dataset as per previously reported RH5 vaccine trials and methodology<sup>12,15,37</sup>. For each assay, in  
564 brief, protein G purified IgG samples were incubated with RBC infected with synchronized *P. falciparum*  
565 3D7 clone parasites in a final volume of 40  $\mu$ L for 40 h at 37 °C, and the final parasitemia in each well  
566 was quantified by biochemical determination of parasite lactate dehydrogenase. All purified IgG samples  
567 were tested initially at 10 mg/mL final test well concentration. For samples with >40 % GIA at 10  
568 mg/mL, a dilution series was tested and used to determine the concentration that gave 50 % GIA (EC<sub>50</sub>).  
569

570 **IFN- $\gamma$  ELISPOT**

571 Fresh PBMC were used in all assays using a previously described protocol<sup>10,12,15</sup>. Spots were counted  
572 using an ELISPOT counter (Autoimmun Diagnostika (AID), Germany). Results are expressed as IFN- $\gamma$   
573 spot-forming units (SFU) per million PBMC with unstimulated control well responses subtracted from  
574 peptide-stimulated well measurements.

575

576 **Statistical Analysis**

577 Data were analyzed using GraphPad Prism version 10.1 for Windows (GraphPad Software Inc.,  
578 California, USA). All tests used were two-tailed and are described in the text. A value of  $P < 0.05$  was  
579 considered significant.

580 **Author Contributions**

581 Conceived and performed the experiments: SES, WFK, JS, IMM, FM, AD, CKB, NB, OH, CGM, SR, SM,  
582 NSL, BS, HM, MM, DMD, LM, GN, BM, OJ, TGM, IAS, RPM, JJK, JRB, LDWK, MMH, DP, CAL,  
583 CMN, KM, SJD, AIO, AMM.

584 Analyzed the data: SES, WFK, JS, TA, KM, SJD, AIO, AMM.

585 Project Management: SA, CC, AML, REC, FLN, RR, J-SC.

586 Wrote the paper: SES, JS, SJD, AMM.

587 **Acknowledgments**

588 The authors are grateful to Julie Furze, Jing Jin, Daniela Tomescu, Rebecca Ashfield, Kate Skinner,  
589 Susanne Hodgson, Cheryl Turner, Jack Quaddy, Subarna Sriskantharajah and Hilary Vitkus for assistance  
590 and Sally Pelling-Deeves for arranging contracts (University of Oxford); Richard Tarrant, Helena  
591 Parracho, Robert Smith and Catherine Green (Clinical Biomanufacturing Facility, University of Oxford);  
592 Jenny Reimer (Novavax); the independent DSMB for their insightful safety oversight (Brian Angus,  
593 Karim Manji, Roma Chilengi, Kwaku Poke Asante, William Macharia and Greg Fegan); and all the study  
594 participants.

595  
596 This work was funded in part by the European and Developing Countries Clinical Trials Partnership  
597 (EDCTP) Multi-Stage Malaria Vaccine Consortium (MMVC) [RIA2016V-1649-MMVC]; an African  
598 Research Leader Award to AIO from the UK Medical Research Council (MRC) [MR/P020593/1], this  
599 award was jointly funded by the UK MRC and the UK Department for International Development (DFID)  
600 under the MRC/DFID Concordat agreement and is also part of the EDCTP2 programme supported by the  
601 European Union; the UK MRC [MR/K025554/1]; the National Institute for Health and Care Research  
602 (NIHR) Oxford Biomedical Research Centre (BRC), the views expressed are those of the authors and not  
603 necessarily those of the NHS, the NIHR, or the Department of Health; the GIA work was supported by

Silk SE *et al.*

604 the Division of Intramural Research, National Institute of Allergy and Infectious Diseases (NIAID) and  
605 by an Interagency Agreement (AID-GH-T-15-00001) between the United States Agency for International  
606 Development (USAID) Malaria Vaccine Development Program (MVDP) and NIAID. The findings and  
607 conclusions are those of the authors and do not necessarily represent the official position of USAID.  
608 CMN held a Wellcome Trust Sir Henry Wellcome Postdoctoral Fellowship [209200/Z/17/Z]. SJD is a  
609 Jenner Investigator.

610

### 611 **Conflict of Interest Statement**

612 LDWK and SJD are named inventors on patent applications relating to RH5 malaria vaccines. AMM has  
613 an immediate family member who is an inventor on patent applications relating to RH5 malaria vaccines.  
614 All other authors have declared that no conflict of interest exists.

615

### 616 **Data and Materials Availability**

617 Requests for materials should be addressed to the corresponding authors.

618 **References**

- 619 1. World Health O. World malaria report 2023. Geneva: World Health Organization; 2023.
- 620 2. Rts SCTP. Efficacy and safety of RTS,S/AS01 malaria vaccine with or without a booster dose in  
621 infants and children in Africa: final results of a phase 3, individually randomised, controlled trial. *Lancet*  
622 2015; **386**(9988): 31-45.
- 623 3. Dattoo MS, Dicko A, Tinto H, et al. Safety and efficacy of malaria vaccine candidate R21/Matrix-  
624 M in African children: a multicentre, double-blind, randomised, phase 3 trial. *Lancet* 2024; **403**(10426):  
625 533-44.
- 626 4. Draper SJ, Sack BK, King CR, et al. Malaria Vaccines: Recent Advances and New Horizons. *Cell*  
627 *Host Microbe* 2018; **24**(1): 43-56.
- 628 5. Scally SW, Triglia T, Evelyn C, et al. PCRCR complex is essential for invasion of human  
629 erythrocytes by Plasmodium falciparum. *Nature microbiology* 2022; **7**(12): 2039-53.
- 630 6. Ragotte RJ, Higgins MK, Draper SJ. The RH5-CyRPA-Ripr Complex as a Malaria Vaccine  
631 Target. *Trends Parasitol* 2020; **36**(6): 545-59.
- 632 7. Crosnier C, Bustamante LY, Bartholdson SJ, et al. Basigin is a receptor essential for erythrocyte  
633 invasion by Plasmodium falciparum. *Nature* 2011; **480**(7378): 534-7.
- 634 8. Douglas AD, Baldeviano GC, Lucas CM, et al. A PfRH5-Based Vaccine Is Efficacious against  
635 Heterologous Strain Blood-Stage Plasmodium falciparum Infection in Aotus Monkeys. *Cell Host*  
636 *Microbe* 2015; **17**(1): 130-9.
- 637 9. Douglas AD, Baldeviano GC, Jin J, et al. A defined mechanistic correlate of protection against  
638 Plasmodium falciparum malaria in non-human primates. *Nat Commun* 2019; **10**(1): 1953.
- 639 10. Payne RO, Silk SE, Elias SC, et al. Human vaccination against RH5 induces neutralizing  
640 antimalarial antibodies that inhibit RH5 invasion complex interactions. *JCI Insight* 2017; **2**(21): 96381.
- 641 11. Bliss CM, Drammeh A, Bowyer G, et al. Viral Vector Malaria Vaccines Induce High-Level T  
642 Cell and Antibody Responses in West African Children and Infants. *Mol Ther* 2017; **25**(2): 547-59.
- 643 12. Silk SE, Kalinga WF, Mtaka IM, et al. Superior antibody immunogenicity of a viral-vectored  
644 RH5 blood-stage malaria vaccine in Tanzanian infants as compared to adults. *Med* 2023; **4**(10): 668-86.
- 645 13. Hjerrild KA, Jin J, Wright KE, et al. Production of full-length soluble Plasmodium falciparum  
646 RH5 protein vaccine using a Drosophila melanogaster Schneider 2 stable cell line system. *Sci Rep* 2016;  
647 **6**: 30357.
- 648 14. Jin J, Tarrant RD, Bolam EJ, et al. Production, quality control, stability, and potency of cGMP-  
649 produced Plasmodium falciparum RH5.1 protein vaccine expressed in Drosophila S2 cells. *NPJ Vaccines*  
650 2018; **3**: 32.
- 651 15. Minassian AM, Silk SE, Barrett JR, et al. Reduced blood-stage malaria growth and immune  
652 correlates in humans following RH5 vaccination. *Med* 2021; **2**(6): 701-19.
- 653 16. Mwamlima TG, Mwakasungula SM, Mkindi CG, et al. Understanding the role of serological and  
654 clinical data on assessing the dynamic of malaria transmission: a case study of Bagamoyo district,  
655 Tanzania. *Pan Afr Med J* 2022; **43**: 60.
- 656 17. Douglas AD, Williams AR, Illingworth JJ, et al. The blood-stage malaria antigen PfRH5 is  
657 susceptible to vaccine-inducible cross-strain neutralizing antibody. *Nat Commun* 2011; **2**: 601.
- 658 18. Osier FH, Mackinnon MJ, Crosnier C, et al. New antigens for a multicomponent blood-stage  
659 malaria vaccine. *Sci Transl Med* 2014; **6**(247): 247ra102.
- 660 19. Sang S, Dattoo M, Otieno E, et al. Safety and immunogenicity of varied doses of R21/Matrix-M?  
661 vaccine at three years follow-up: A phase 1b age de-escalation, dose-escalation trial in adults, children,  
662 and infants in Kilifi-Kenya [version 1; peer review: awaiting peer review]. *Wellcome open research* 2023;  
663 **8**(450).

- 664 20. Venkatraman N, Tiono AB, Bowyer G, et al. Phase I assessments of first-in-human  
665 administration of a novel malaria anti-sporozoite vaccine candidate, R21 in matrix-M adjuvant, in UK and  
666 Burkinabe volunteers. *medRxiv* 2019: 19009282.
- 667 21. [https://www.nbs.go.tz/nbs/takwimu/census2012/Mortality\\_and\\_Health\\_Monograph.pdf](https://www.nbs.go.tz/nbs/takwimu/census2012/Mortality_and_Health_Monograph.pdf).
- 668 22. Heath PT, Galiza EP, Baxter DN, et al. Safety and Efficacy of NVX-CoV2373 Covid-19  
669 Vaccine. *N Engl J Med* 2021; **385**(13): 1172-83.
- 670 23. Nielsen CM, Ogbe A, Pedroza-Pacheco I, et al. Protein/AS01B vaccination elicits stronger, more  
671 Th2-skewed antigen-specific human T follicular helper cell responses than heterologous viral vectors.  
672 *Cell Rep Med* 2021; **2**(3): 100207.
- 673 24. Barrett JR, Silk SE, Mkindi CG, et al. Analyses of human vaccine-specific circulating and bone  
674 marrow-resident B cell populations reveal benefit of delayed vaccine booster dosing with blood-stage  
675 malaria antigens. *Front Immunol* 2023; **14**: 1193079.
- 676 25. Nielsen CM, Barrett JR, Davis C, et al. Delayed boosting improves human antigen-specific Ig and  
677 B cell responses to the RH5.1/AS01B malaria vaccine. *JCI Insight* 2023; **8**(2).
- 678 26. McNamara HA, Idris AH, Sutton HJ, et al. Antibody Feedback Limits the Expansion of B Cell  
679 Responses to Malaria Vaccination but Drives Diversification of the Humoral Response. *Cell Host*  
680 *Microbe* 2020; **28**(4): 572-85 e7.
- 681 27. Regules JA, Cicatelli SB, Bennett JW, et al. Fractional Third and Fourth Dose of RTS,S/AS01  
682 Malaria Candidate Vaccine: A Phase 2a Controlled Human Malaria Parasite Infection and  
683 Immunogenicity Study. *J Infect Dis* 2016; **214**(5): 762-71.
- 684 28. Samuels AM, Ansong D, Kariuki SK, et al. Efficacy of RTS,S/AS01(E) malaria vaccine  
685 administered according to different full, fractional, and delayed third or early fourth dose regimens in  
686 children aged 5-17 months in Ghana and Kenya: an open-label, phase 2b, randomised controlled trial.  
687 *Lancet Infect Dis* 2022; **22**(9): 1329-42.
- 688 29. Rts SCTP. Efficacy and safety of the RTS,S/AS01 malaria vaccine during 18 months after  
689 vaccination: a phase 3 randomized, controlled trial in children and young infants at 11 African sites. *PLoS*  
690 *Med* 2014; **11**(7): e1001685.
- 691 30. Leroux-Roels G, Leroux-Roels I, Clement F, et al. Evaluation of the immune response to  
692 RTS,S/AS01 and RTS,S/AS02 adjuvanted vaccines: randomized, double-blind study in malaria-naive  
693 adults. *Hum Vaccin Immunother* 2014; **10**(8): 2211-9.
- 694 31. Barrett JR, Pipini D, Wright ND, et al. Analysis of the Diverse Antigenic Landscape of the  
695 Malaria Invasion Protein RH5 Identifies a Potent Vaccine-Induced Human Public Antibody Clonotype.  
696 *bioRxiv* 2023: 2023.10.04.560576.
- 697 32. Miura K, Perera S, Brockley S, et al. Non-apical membrane antigen 1 (AMA1) IgGs from Malian  
698 children interfere with functional activity of AMA1 IgGs as judged by growth inhibition assay. *PLoS One*  
699 2011; **6**(6): e20947.
- 700 33. Willcox AC, Huber AS, Diouf A, et al. Antibodies from malaria-exposed Malians generally  
701 interact additively or synergistically with human vaccine-induced RH5 antibodies. *Cell Rep Med* 2021;  
702 **2**(7): 100326.
- 703 34. Sheehy SH, Duncan CJ, Elias SC, et al. Phase Ia Clinical Evaluation of the Safety and  
704 Immunogenicity of the Plasmodium falciparum Blood-Stage Antigen AMA1 in ChAd63 and MVA  
705 Vaccine Vectors. *PLoS One* 2012; **7**(2): e31208.
- 706 35. Miura K, Orcutt AC, Muratova OV, Miller LH, Saul A, Long CA. Development and  
707 characterization of a standardized ELISA including a reference serum on each plate to detect antibodies  
708 induced by experimental malaria vaccines. *Vaccine* 2008; **26**(2): 193-200.
- 709 36. Malkin EM, Diemert DJ, McArthur JH, et al. Phase 1 clinical trial of apical membrane antigen 1:  
710 an asexual blood-stage vaccine for Plasmodium falciparum malaria. *Infect Immun* 2005; **73**(6): 3677-85.
- 711 37. Miura K, Diouf A, Fay MP, et al. Assessment of precision in growth inhibition assay (GIA) using  
712 human anti-PfRH5 antibodies. *Malar J* 2023; **22**(1): 159.

713 **Figure Legends**

714 **Figure 1: Trial profile.**

715 “Adults 10M” (adults aged 18-45 years) received 10 µg RH5.1 with 50 µg Matrix-M™ at 0, 1 and 2  
716 months. “Adults Delayed-Fractional [DFx]” (adults aged 18-45 years) received 50 µg RH5.1 with 50 µg  
717 Matrix-M™ at 0 and 1 months and 10 µg RH5.1 with 50 µg Matrix-M™ at 6 months. “Infants 10M”  
718 (infants aged 5-17 months) received 10 µg RH5.1 with 50 µg Matrix-M™ at 0, 1 and 2 months. “Infants  
719 10D” (infants aged 5-17 months) received 10 µg RH5.1 with 50 µg Matrix-M™ at 0, 1 and 6  
720 months. “Infants DFx” (infants aged 5-17 months) received 50 µg RH5.1 with 50 µg Matrix-M™ at 0 and  
721 1 months and 10 µg RH5.1 with 50 µg Matrix-M™ at 6 months. “High Infants DFx” (infants aged 5-17  
722 months with higher prior malaria exposure based on anti-parasite lysate IgG at screening) received 50 µg  
723 RH5.1 with 50 µg Matrix-M™ at 0 and 1 months and 10 µg RH5.1 with 50 µg Matrix-M™ at 6 months.  
724 The main reason for participant withdrawal was consent withdrawal which was not due to adverse  
725 experience. Two participants died during the course of the study unrelated to study vaccination. All  
726 participants who received at least a single dose of RH5.1/Matrix-M™ were analyzed as part of the safety  
727 cohort. All participants who received at least a single dose of RH5.1/Matrix-M™ for whom data  
728 concerning immunogenicity endpoint measures were available were analyzed as part of the  
729 immunogenicity cohort. Two participants in the “High Infants DFx” group were recruited in error at  
730 below the “high” exposure threshold and are included in the immunogenicity analysis as indicated in  
731 subsequent figures.

732

733 **Figure 2: Solicited adverse events (AEs) following vaccination.**

734 Participants (or their carers) were asked about the presence of systemic and local AEs on the day of each  
735 study vaccination and for the following 7 days. The maximum severity reported by each participant for

736 each AE after each study vaccination is shown. 10M = monthly vaccination regimen; DFx = delayed-  
737 fractional regimen; 10D = delayed regimen.

738

### 739 **Figure 3. Serum antibody response to vaccination.**

740 Median and individual anti-RH5.1 serum total IgG responses as measured by ELISA are shown at 14  
741 days post-second vaccination (V2+14), day of third vaccination (V3), and 14, 309 and 674 days post-third  
742 vaccination (V3+14 / 309 / 674) for (A) “Adults 10M” (N=5) and “Adults DFx” (N=6), and (B) “Infants  
743 10M” (N=10-12), “Infants 10D” (N=11-12) and “Infants DFx” (N=8-12). “Infants 10M” and “Infants  
744 10D” data were pooled at V2+14 due to identical immunization and dosing regimen at this time-point.  
745 The red dotted line indicates the protective threshold associated with protection against *P. falciparum*  
746 blood-stage challenge in RH5-vaccinated *Aotus* monkeys (~300 µg/mL)<sup>8</sup>. (C) ELISA data shown for the  
747 “Infants DFx” (N=8-12) and “High Infants DFx” (N=10-11) groups. Open symbols indicate N=2  
748 participants who did not meet high pre-exposure threshold. Group kinetic responses are shown in **Figure**  
749 **S6C**. Analyses used Mann-Whitney test between dosing regimens within age groups only, \**P* < 0.05, \*\**P*  
750 < 0.01; and Kruskal-Wallis with Dunn’s multiple comparison test for V3, V3+14, V3+309 and V3+674 in  
751 (B) \**P* < 0.05, \*\**P* < 0.01, \*\*\**P* < 0.001, \*\*\*\**P* < 0.0001.

752

### 753 **Figure 4. Functional GIA induced by RH5 vaccination.**

754 *In vitro* GIA of total IgG purified from serum was assessed against 3D7 clone *P. falciparum* parasites.  
755 Median and individual values are shown for each group at (A) Baseline (day 0) at 10 mg/mL total IgG;  
756 (B) 14 days post-third vaccination (V3+14) at 10 mg/mL total IgG; and (C) V3+14 at 2.5 mg/mL total  
757 IgG (“Adults 10M” N=4-6; “Adults DFx” N=6; “Infants 10M” N=12; “Infants 10D” N=11; “Infants  
758 DFx” N=12). Open circle datapoint in (C) is arbitrarily set at 0 % GIA and for the sample not titrated in  
759 the assay. Red dashed line in (C) indicates threshold of 60 % GIA associated with protective outcome in



760 RH5-vaccinated and *P. falciparum* challenged *Aotus* monkeys<sup>8</sup>. Analysis between infant dosing regimens  
761 by Kruskal-Wallis with Dunn's multiple comparison test, \* $P < 0.05$ , \*\* $P < 0.01$ . (D) GIA of samples at  
762 baseline and V3+14 tested at 10 mg/mL and 2.5 mg/mL total IgG from the "Infants Dfx" (N=12) and  
763 "High Infants Dfx" (N=10-12) cohorts. Open symbols indicate N=2 participants who did not meet the  
764 high pre-exposure threshold. Analysis used Mann-Whitney test to compare between the two groups; ns =  
765 not significant. (E) V3+14 samples were titrated in the GIA assay using a 2-fold dilution series starting at  
766 10 mg/mL. Relationship between GIA data from the dilution series and the concentration of anti-RH5.1-  
767 specific IgG used in the assay as measured by ELISA in the total IgG is shown. Non-linear regression  
768 curves (constrained to  $>0\%$  and  $<100\%$  GIA) are shown for each group. The  $EC_{50}$  (concentration of anti-  
769 RH5.1 polyclonal IgG that gives 50% GIA) was calculated (dashed line represents 50% GIA) using data  
770 points pooled across all groups ( $r^2 = 0.95$ , N=487).

# Figure 1

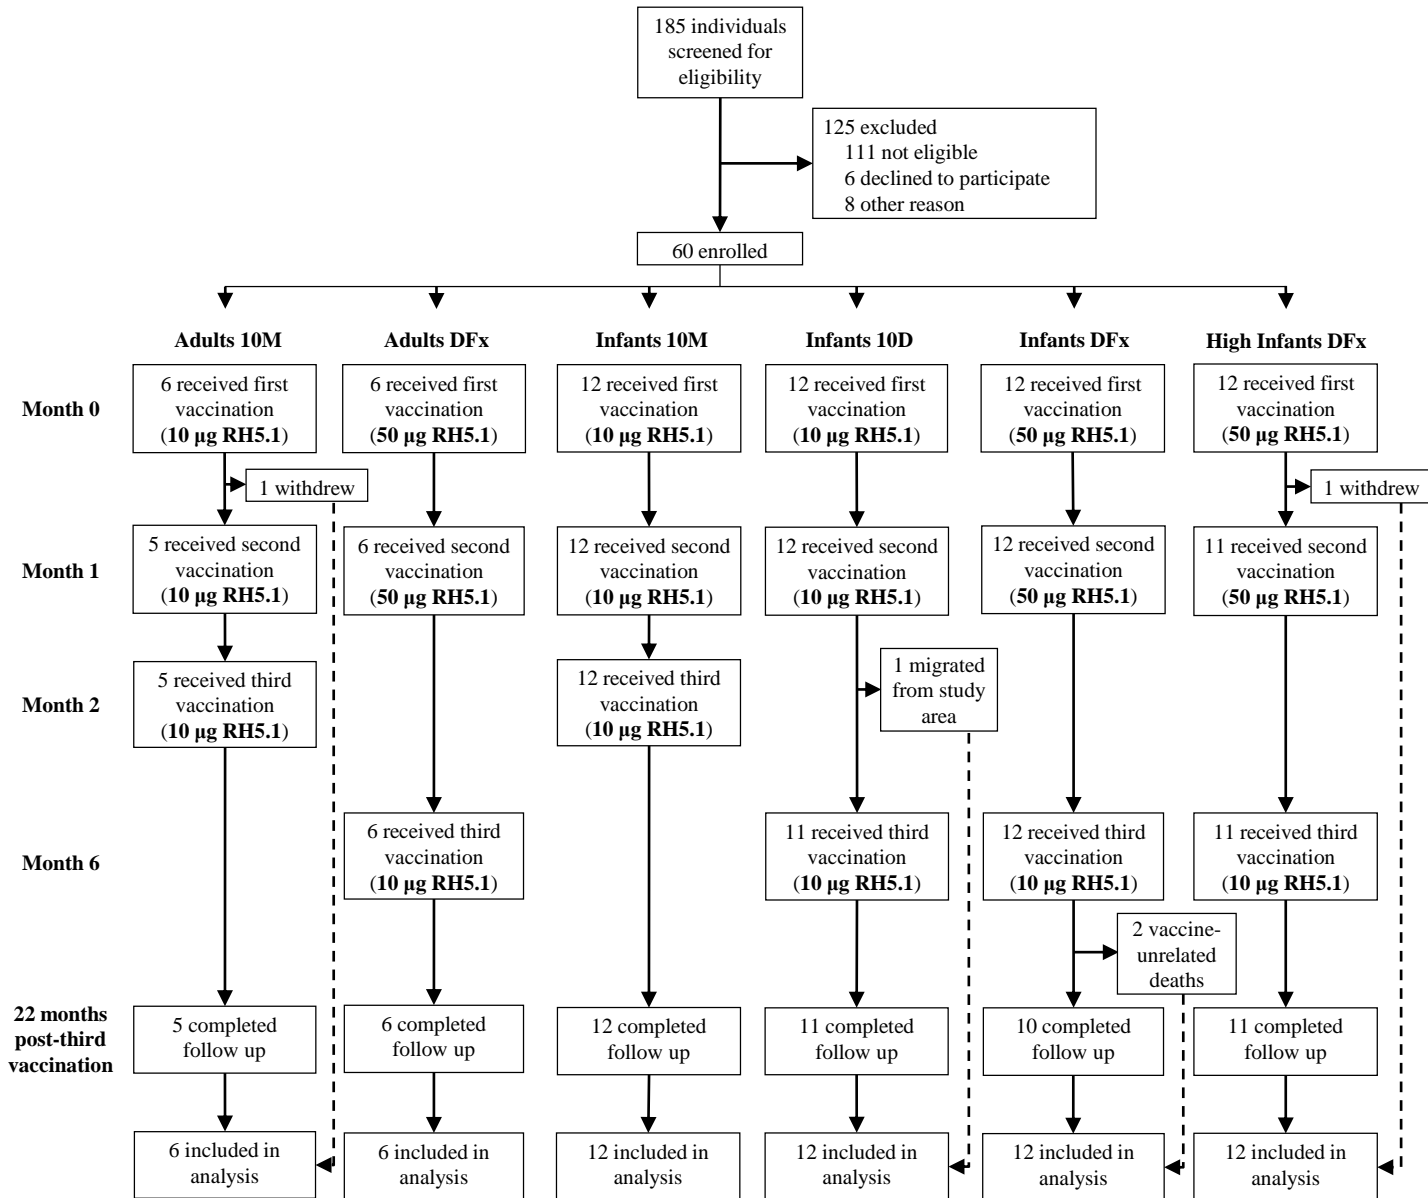

# Figure 2

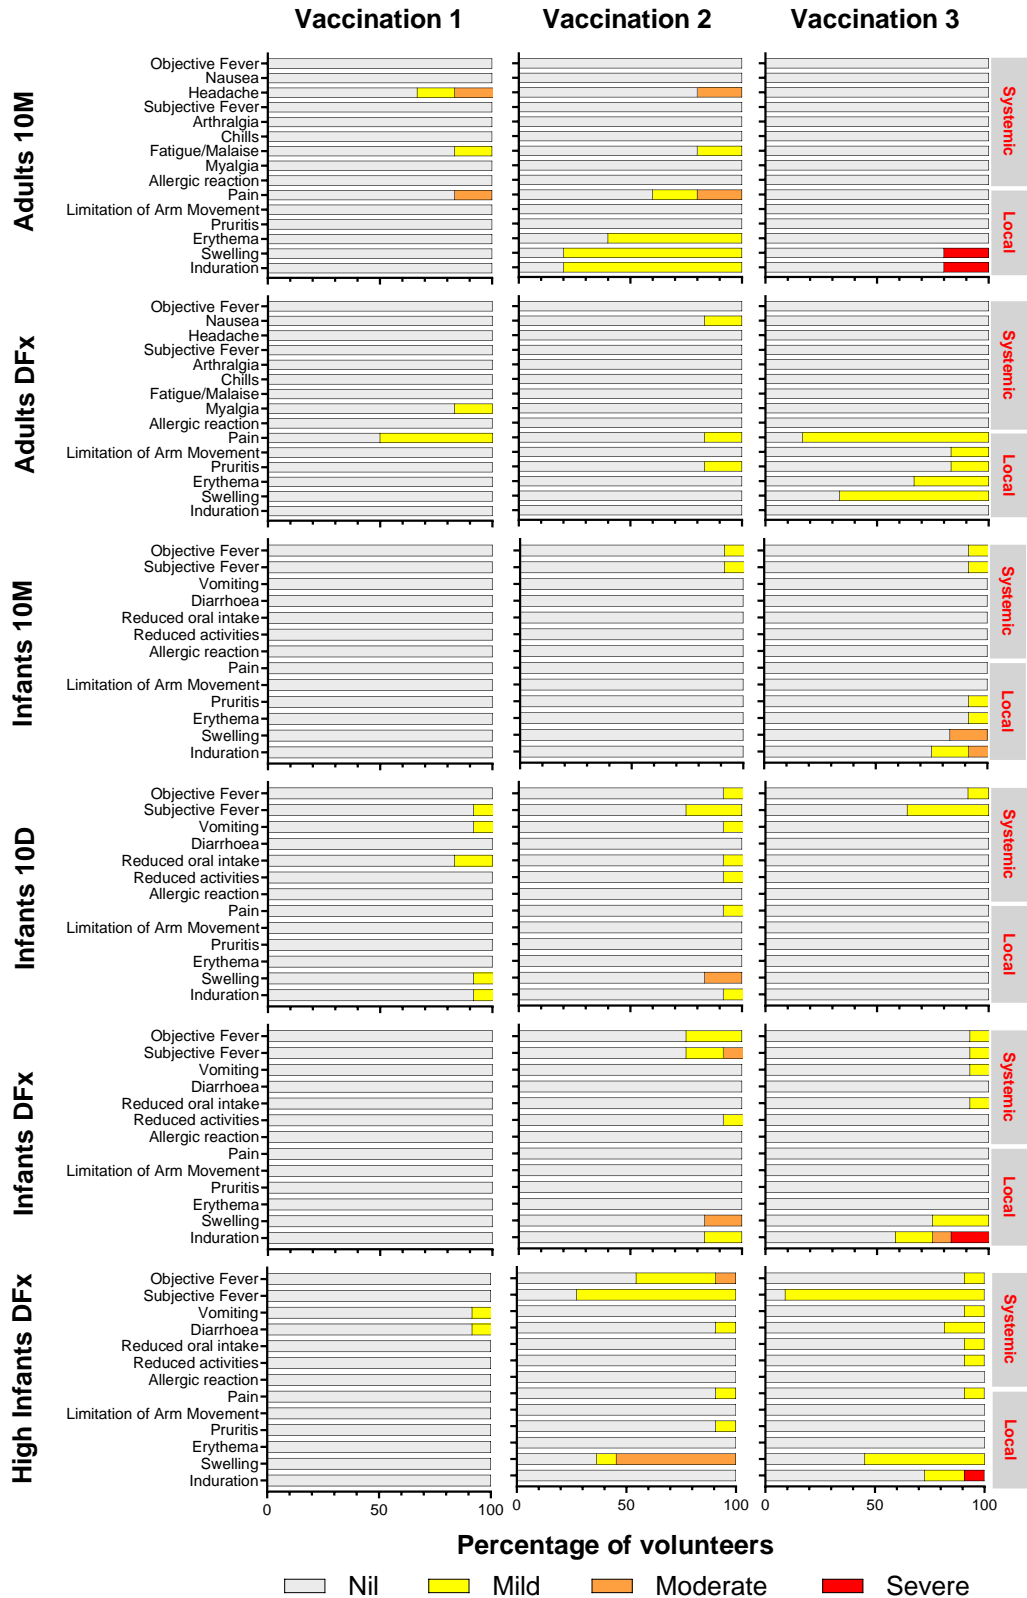

# Figure 3

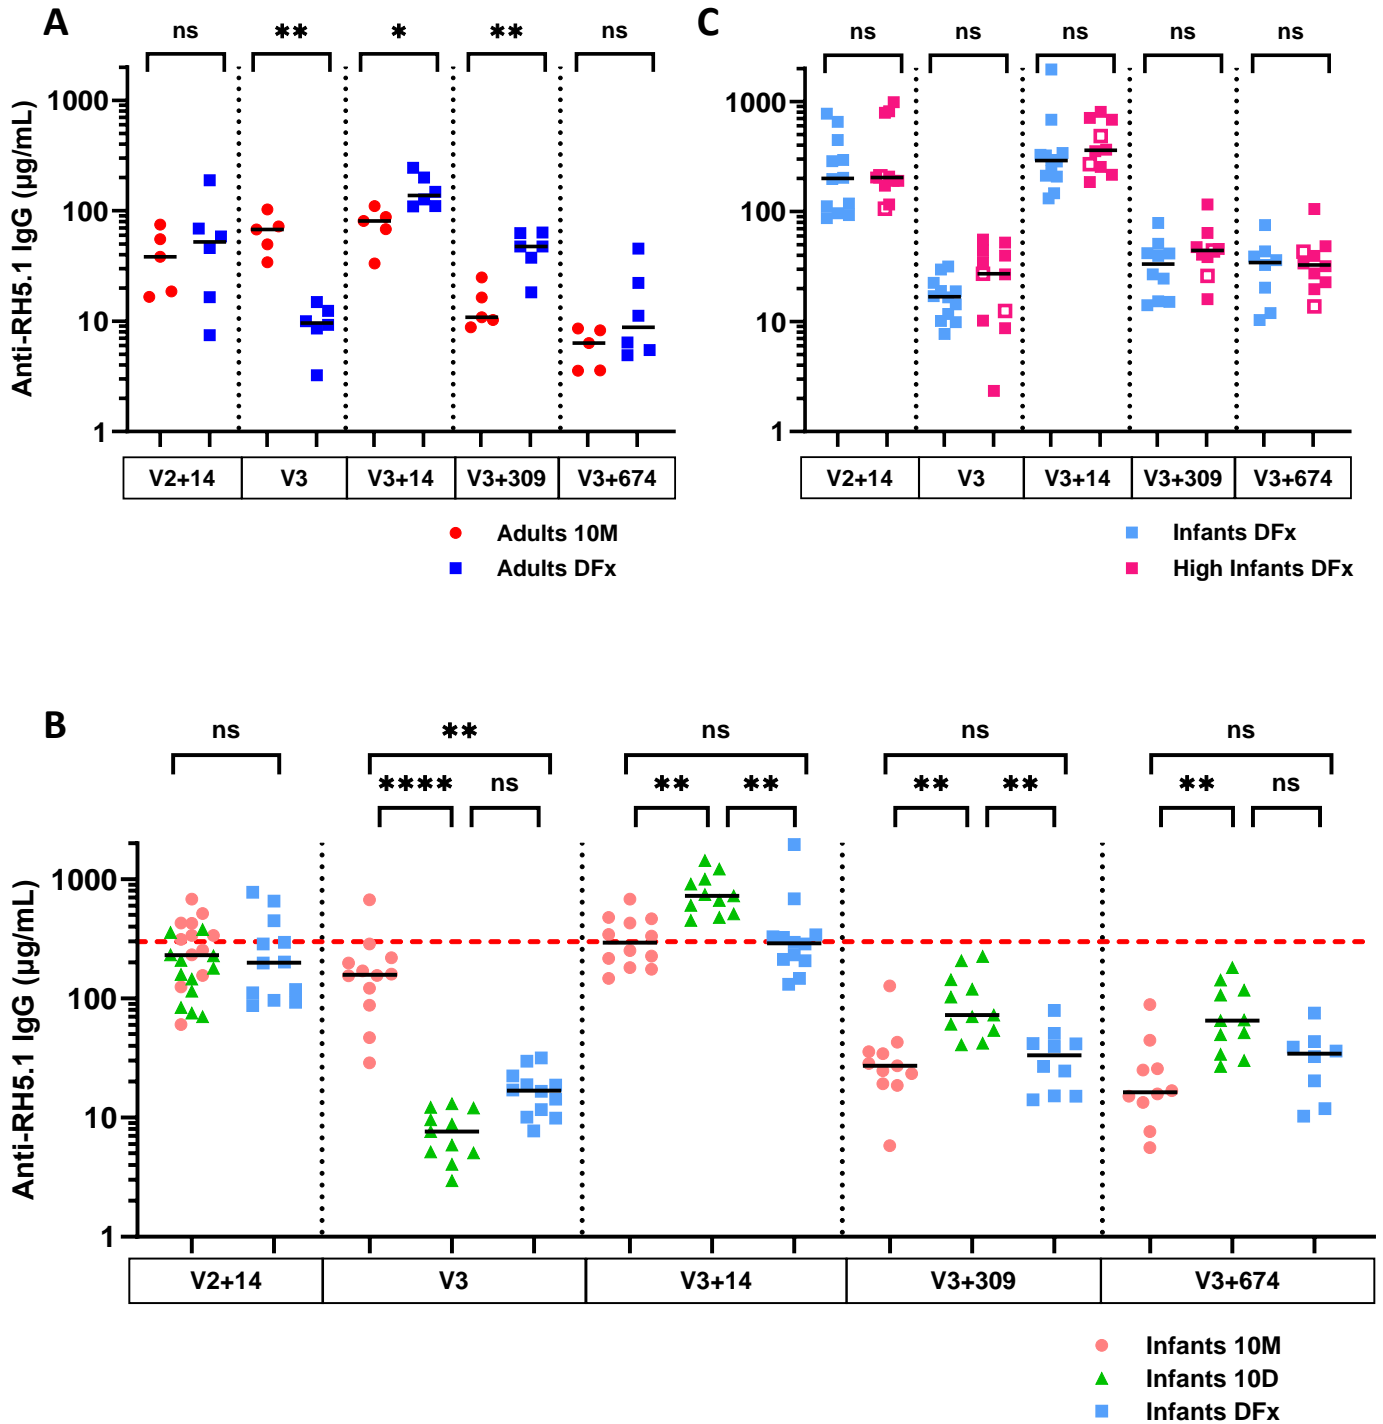

Source: https://medrxiv.org/content/10.1101/2024.03.25.24304862v1.full.pdf
